## The unseen and pervasive threat of COVID-19 throughout the US

Emily Javan, Dr. Spencer J. Fox, Dr. Lauren Ancel Meyers

Corresponding author:

Lauren Ancel Meyers

The University of Texas at Austin

[laurenmeyers@austin.utexas.edu](mailto:laurenmeyers@austin.utexas.edu)

TO THE EDITOR:

Over the course of a few weeks, COVID-19 has emerged in all 50 US states. Officials are weighing the potentially enormous economic and societal costs of strict social distancing measures against the *unseen* risks of COVID-19 hospitalizations and mortality in their communities. To support decision making, we have estimated the likelihood that each county in the US already has extensive community transmission (Figure 1).

To make these risk assessments, we applied a model that we developed for another silent spreader—Zika—which threatened to emerge in southern US states in 2016<sup>1</sup>. Using stochastic simulations, we determine the probability that a county already has an ongoing COVID-19 epidemic by the time the county reports just one, two, three or more cases. The levels of risk displayed in Figure 1 are based on reported cases as of April 13, 2020<sup>2</sup> and account for under-reporting, the uncertainty in the transmission rate of COVID-19, the likelihood of super-spreading events—like those that fueled SARS outbreaks in 2003 and have been reported recently for COVID-19<sup>3</sup>—and the impact of social distancing measures that have been enacted across the US in recent weeks (see Supplemental Appendix).

By the time a first case of COVID-19 is reported in the county, we estimate that there is over a 50% chance that a full-blown epidemic is underway. We found 85% of US counties with 96% of the national population have reported at least one case (Figure 1). Even counties that have not *yet* reported a confirmed case have an estimated 9% chance of sustained local transmission. If an epidemic is indeed underway, then our model predicts a delay of 7.5 (95% CI 3.9-16.3) weeks between the first reported case and the total number of COVID-19 exceeding 1,000; by the time the tenth case has been reported this lead time shrinks to 4.4 (95% CI 2.1-11.4) weeks (see Supplementary Appendix).

Given the speed and stealth with which COVID-19 spreads<sup>4</sup>, the entire map will likely be fully red within a week or two. Proactive social distancing can block community transmission, avert catastrophic surges in hospitalizations, and save lives<sup>5</sup>. For those still weighing if, when, and how aggressively to act, there is little time for delay.

April 14, 2020

NOTE: This preprint reports new research that has not been certified by peer review and should not be used to guide clinical practice.

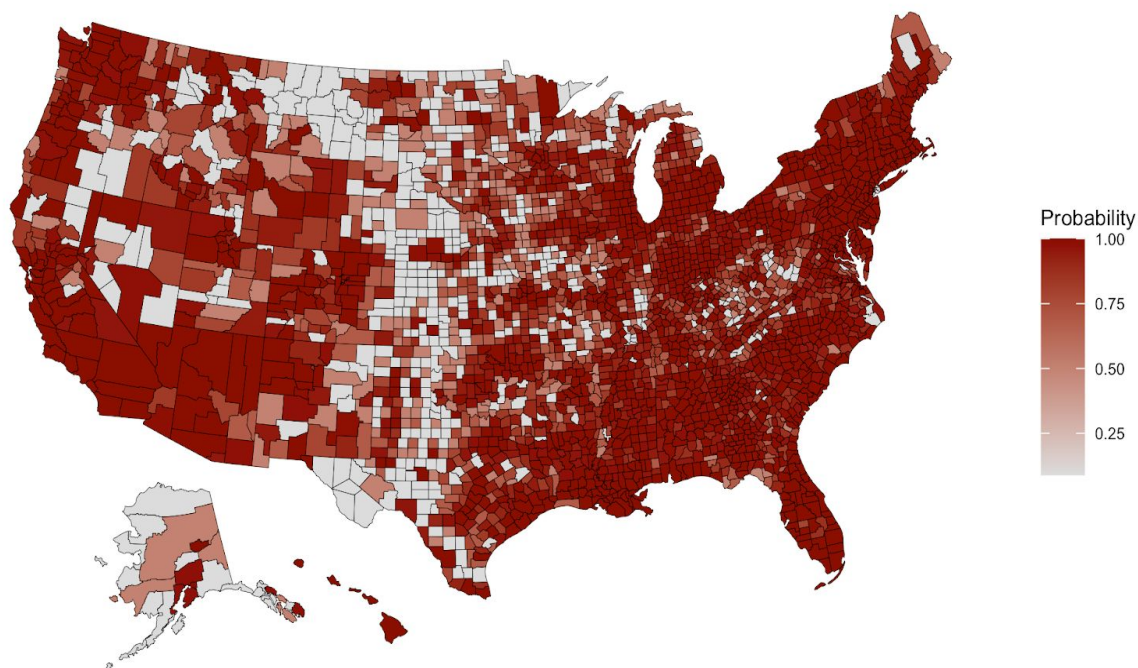

**Figure 1:** Probability of ongoing COVID-19 epidemics in the 3142 counties of the United States. The risk of an unseen epidemic in a county with only a single reported case is 50%. The risk in counties that have not yet reported cases is 9%.

## References

1. Castro LA, Fox SJ, Chen X, et al. Assessing real-time Zika risk in the United States. *BMC Infect Dis* 2017;17(1):284.
2. Smith M, Yourish K, Almukhtar S, Collins K, Ivory D, Harmon A. The New York Times Coronavirus (Covid-19) Data in the United States [Internet]. 2020 [cited 2020 Apr 13]; Available from: <https://github.com/nytimes/covid-19-data>
3. Lloyd-Smith JO, Schreiber SJ, Kopp PE, Getz WM. Superspreading and the effect of individual variation on disease emergence. *Nature* 2005;438(7066):355–9.
4. Li R, Pei S, Chen B, et al. Substantial undocumented infection facilitates the rapid dissemination of novel coronavirus (COVID-19). *Science* 2020; Available from: <http://dx.doi.org/10.1126/science.abb3221>
5. Cowling BJ, Ali ST, Ng TWY, et al. Impact assessment of non-pharmaceutical interventions against COVID-19 and influenza in Hong Kong: an observational study [Internet]. 2020; Available from: <http://dx.doi.org/10.1101/2020.03.12.20034660>
